# Supplementary material for: m6A is required for resolving progenitor identity during planarian stem cell differentiation
Source: PubMed Central journal article supplement — EMBO J. 2022 Aug 16;41(21):e109895. doi: 10.15252/embj.2021109895 (PMC9627665; doi:10.15252/embj.2021109895), 2022-08-16
Supplement: EMBJ-41-e109895-s006.pdf [file EMBJ-41-e109895-s006.pdf]

1 m6A is required for resolving progenitor identity during  
2 planarian stem cell differentiation

3 Yael Dagan<sup>1\*</sup>, Yarden Yesharim<sup>1\*</sup>, Ashley R. Bonneau<sup>2,3,4</sup>, Tamar Frankovits<sup>1</sup>, Schraga Schwartz<sup>5</sup>, Peter W.  
4 Reddien<sup>2,3,4</sup>, Omri Wurtzel<sup>1,6,7</sup>

5 <sup>1</sup> School of Neurobiology, Biochemistry, and Biophysics, The George S. Wise Faculty of Life Sciences, Tel Aviv University, 69978  
6 Tel Aviv, Israel

7 <sup>2</sup> Whitehead Institute for Biomedical Research, Cambridge, MA 02142, USA

8 <sup>3</sup> Department of Biology, Massachusetts Institute of Technology, Cambridge, MA 02139, USA

9 <sup>4</sup> Howard Hughes Medical Institute, Chevy Chase, MD 20815, USA

10 <sup>5</sup> Department of Molecular Genetics, Weizmann Institute of Science, 7610001 Rehovot, Israel

11 <sup>6</sup> Sagol School of Neuroscience, Tel Aviv University, Tel Aviv, Israel

12 \* These authors contributed equally

13 <sup>7</sup> Correspondence: owurtzel@tauex.tau.ac.il

|    |                                                                           |    |
|----|---------------------------------------------------------------------------|----|
| 14 | <b>Table of contents</b>                                                  |    |
| 15 | Appendix Figure S1                                                        | 3  |
| 16 | Appendix Figure S2                                                        | 5  |
| 17 | Appendix Figure S3                                                        | 7  |
| 18 | Appendix Figure S4                                                        | 8  |
| 19 | Appendix Figure S5                                                        | 10 |
| 20 | Appendix Table S1. Gene models of contig IDs in figures                   | 11 |
| 21 | Appendix Table S2. Genes cloned in this study                             | 12 |
| 22 | Appendix Table S3. Inline m6A-seq2 barcode sequences                      | 14 |
| 23 | Appendix Table S4. Mapping of library data to the planarian transcriptome | 15 |
| 24 | Appendix Table S5. qPCR primers used in this study                        | 17 |
| 25 | Supplementary References                                                  | 18 |
| 26 |                                                                           |    |
| 27 |                                                                           |    |

28 Appendix Figure S1

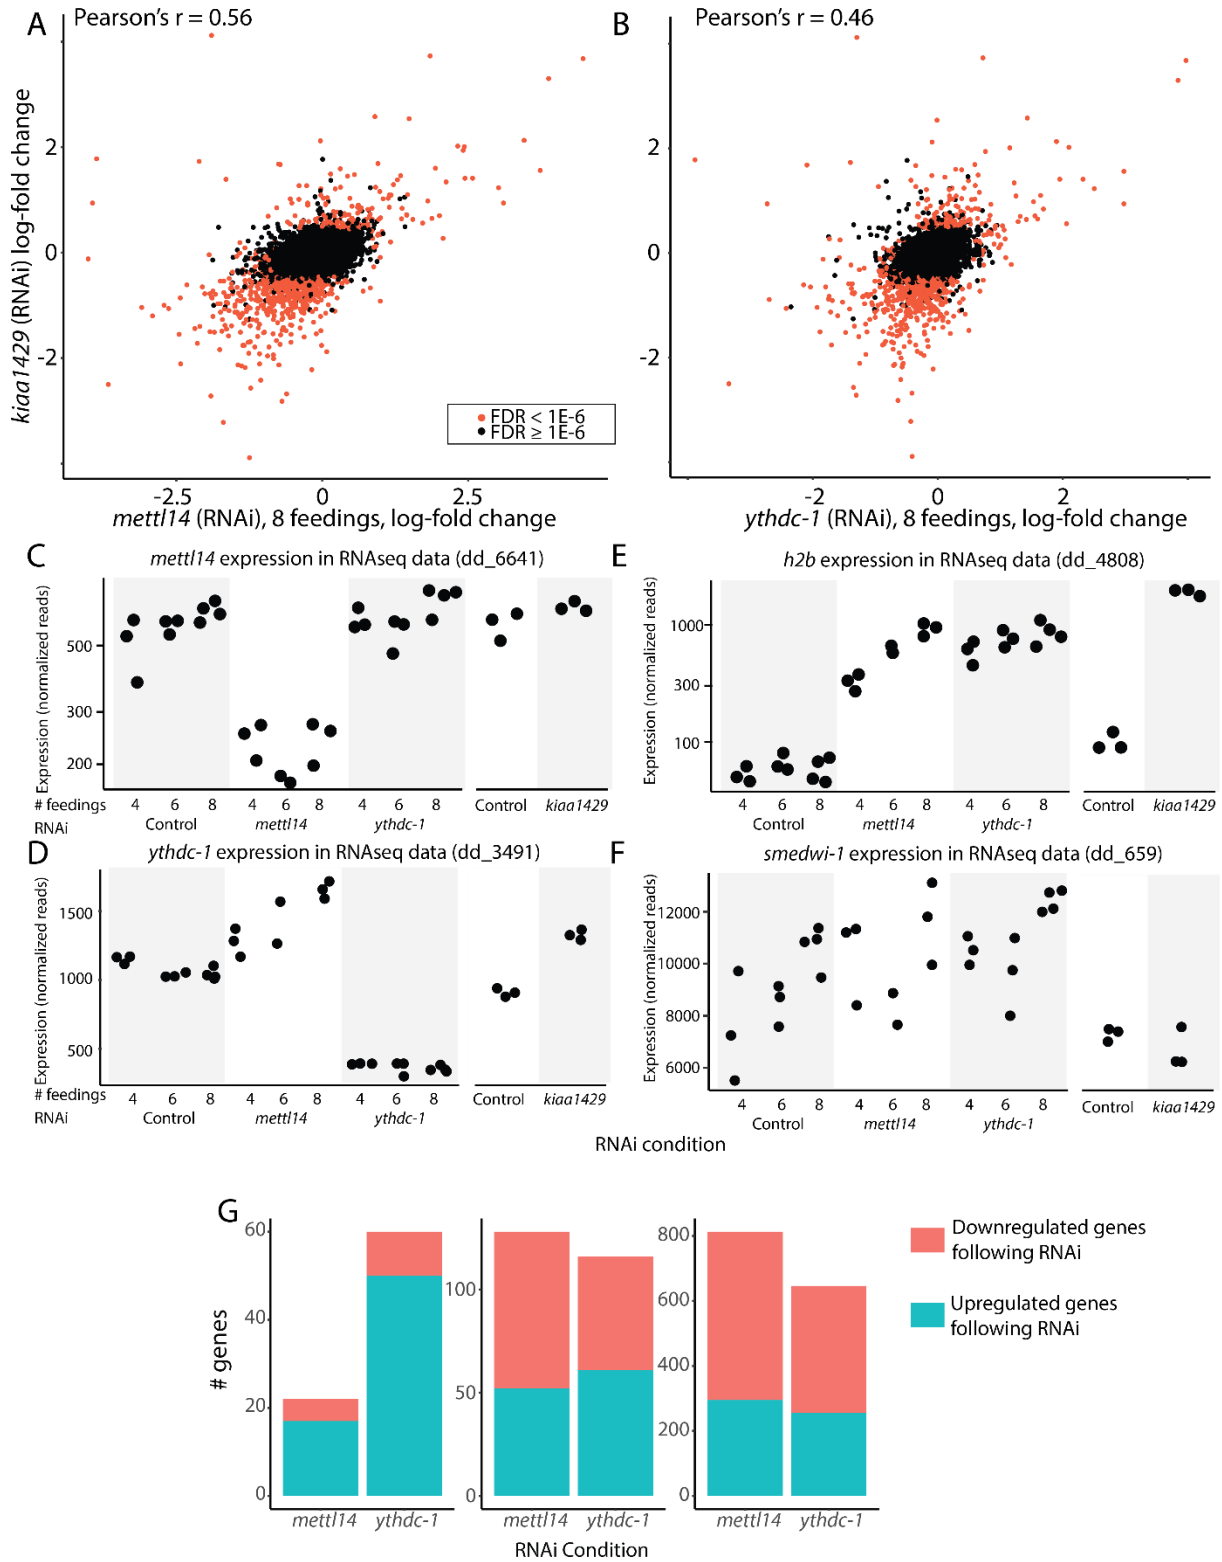

30 Appendix Figure S1. Specificity of RNAi of m6A genes. (A-B) Shown is the correlation in gene expression changes  
31 between experimental conditions. Each dot represents the log fold-change of a single gene, colored based on  
32 significance threshold (FDR threshold  $< 1E-6$ ). For both panels the p-value of the correlation  $< 2.2E-16$ . (C-F) Shown  
33 is the normalized gene expression in RPKM for genes across the different libraries. RNAseq analysis validated the  
34 efficiency and the specificity of the RNAi (C-D). The expression of *h2b* was upregulated in all of the tested  
35 conditions (E). By contrast, the expression of *smedwi-1* did not change significantly following inhibition of m6A  
36 genes (F). (E) The number of significantly upregulated and downregulated genes is shown at each of the tested  
37 time points (FDR of genes included  $< 1E-5$ ; Dataset EV2). In the early time point (four RNAi feedings) most of the  
38 genes were upregulated. However, at later time points, most differentially expressed genes are downregulated,  
39 which likely represent indirect effects of the RNAi, such as depletion of cell populations.

40 **Appendix Figure S2**

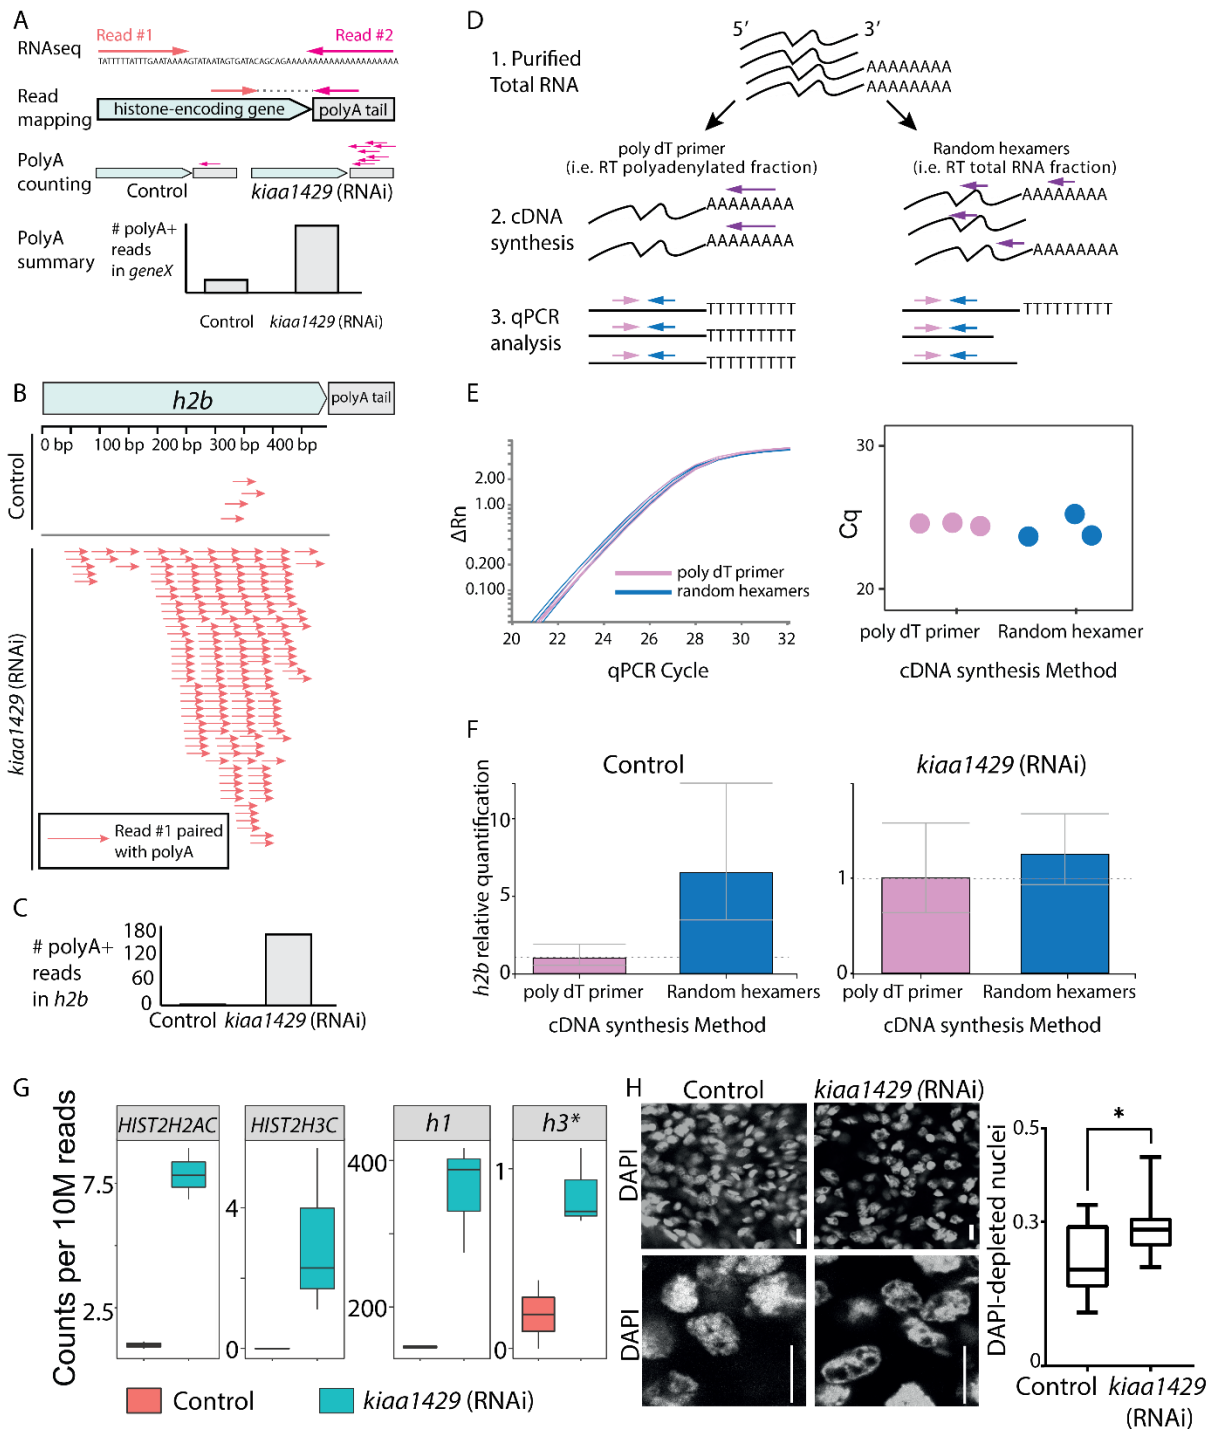

41

42 **Appendix Figure S2. Analysis of histone transcript polyadenylation following inhibition of m6A genes. (A) Paired-**  
 43 **end RNAseq data was used for identifying polyA containing histone transcripts. Reads mapped (read #1) to histone**

44 genes without proper read-pairing were computationally isolated, and their read pair (read #2) was collected from  
45 the raw data files. If the unmapped read (read #2) contained a poly-dT sequence, which is the reverse-complement  
46 of polyA, then the read was counted as a polyadenylated histone transcript. (B-C) Shown are RNAseq reads  
47 mapped to *h2b* (dd\_4808; gene model SMESG000067906), which had a paired-read (read #2) containing polyA.  
48 Control sample (top) has fewer reads mapped to *h2b* compared to the *kiaa1429* (RNAi) sample (bottom). The total  
49 number of polyA containing read-pairs mapped to *h2b* is shown in panel C. (D) qPCR strategy for estimating the  
50 fraction of polyadenylated and non-polyadenylated *h2b*. Purified RNA (1) was reverse-transcribed with a poly-dT,  
51 or random hexamers (2). Then, qPCR is performed with internal primers (3). (E) The expression of *gapdh* was  
52 measured using RNA that was purified from wild type planarians. The analysis was used to estimate the efficiency  
53 of qPCR using cDNA produced either with poly-dT priming or using random hexamers. The change in reporter  
54 signal (y-axis) as a function of the qPCR cycle was similar for both groups (left), as is the quantification cycle (C<sub>q</sub>,  
55 right). The analysis demonstrated that reverse-transcription with poly-dT and random hexamers was similarly  
56 efficient. (F) Shown in the relative quantification of polyadenylated *h2b* and non-polyadenylated *h2b* in control  
57 (left) and following *kiaa1429* (RNAi). The increase in polyadenylated *h2b* expression following *kiaa1429* (RNAi)  
58 was observed despite a lack of increase in total *h2b* expression (right). Error bars are the 95% confidence interval.  
59 (G) Shown is the number of polyA containing reads for several of the overexpressed histone components encoding  
60 genes in RNAseq data per 10M library reads (*h3\** is the putative *histone 3* transcript that is transcribed from contig  
61 dd\_25629, gene model SMESG000013634). Horizontal line indicates the median. (H) Comparison of DNA density  
62 by using DAPI-labeling on control and *kiaa1429* (RNAi) animals. DAPI-labeling, which correlates with chromatin  
63 density, showed an overabundance of DAPI-poor nuclei in *kiaa1429* (RNAi) animals. This suggested that *kiaa1429*  
64 (RNAi) chromatin packaging was altered, and indicated that euchromatin might be more prevalent in *kiaa1429*  
65 (RNAi), which might therefore affect transcriptional regulation. High magnification images (bottom) were  
66 acquired from different field-of-views from similar anatomical areas. Whiskers indicate the range of DAPI-poor-  
67 nuclei to nuclei ratio in the images, boxes indicate the interquartile range (IQR), and central band indicates the  
68 mean (n = 10 biological replicates per group). Student's t-test \* p < 0.05. Scale = 10 μm.

69 Appendix Figure S3

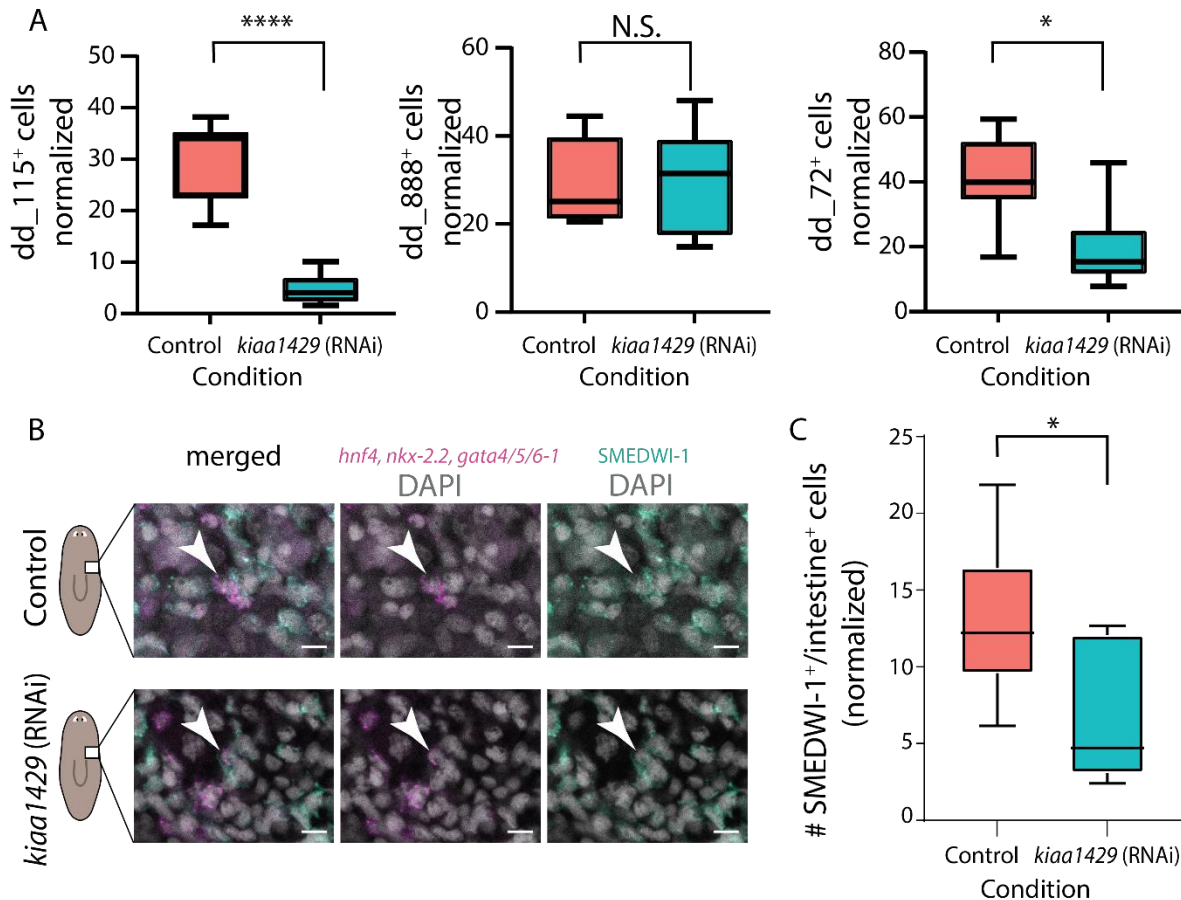

70

71 Appendix Figure S3. Reduction in intestinal cells following *kiaa1429* (RNAi). (A) Shown are cell counting of FISH  
 72 images in *kiaa1429* (RNAi) and in control animals normalized by the area of counting (rectangular region anterior  
 73 to the pharynx and posterior to the brain; Methods). Representative images are shown in Figure 6E (Two sided  
 74 Student's t-test  $p = 1.2E-7$  and  $0.001$  for dd\_115 and dd\_72, respectively followed by Bonferroni's correction). (B)  
 75 Shown is co-labeling of recently integrated intestinal cells into to intestine structure by using a mix probes for  
 76 detection of intestine-specific transcription factors (i.e., *hnf4*, *nkx-2.2*, and *gata4/5/6-1*), and anti-SMEDWI-1,  
 77 which labels neoblasts and recent progeny (Guo *et al*, 2006). White arrowheads indicate double positive cell. Scale  
 78 = 10  $\mu$ m. (C) Quantification of co-labeled SMEDWI-1+/intestine+ cells is shown in Control and *kiaa1429* (RNAi)  
 79 animals, based on cell counting from z-stack images (two sided Student's t-test = 0.02).

80 Appendix Figure S4

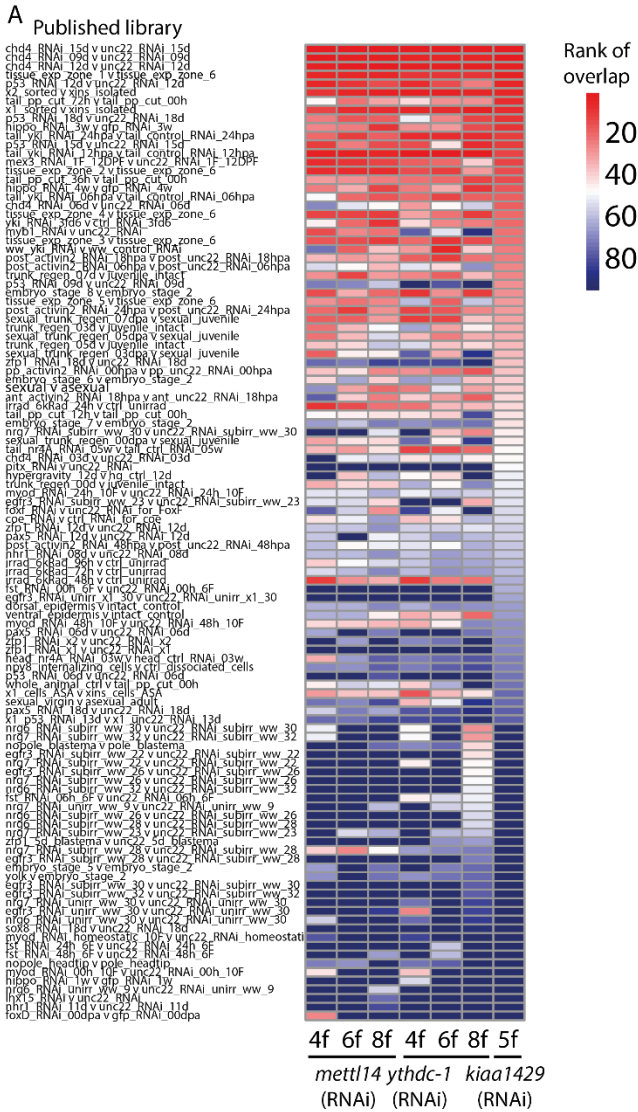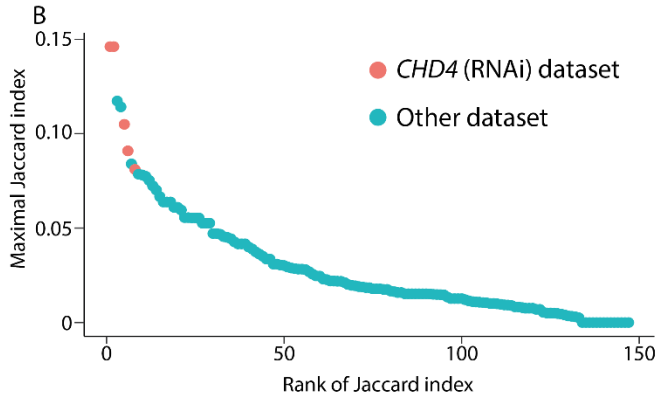



82 Appendix Figure S4. Overlap in differentially expressed genes. (A) Shown is the rank of overlap between the  
83 RNAseq libraries produced here and the published planarian datasets. The rank was determined by counting the  
84 number of overlapping and non-overlapping differentially expressed genes in the datasets produced here and in  
85 published datasets (FDR < 1E-5 and TPM > 10), and calculating the hypergeometric p-value for the overlap (Table  
86 EV1; blue to red, low and high ranked significance of overlap, respectively). (B) Plot showing the maximal Jaccard  
87 index calculated between up-to the top 200 differentially expressed genes in the published planarian datasets  
88 used here (Table EV1) and up-to the top 200 differentially expressed genes of each of the datasets produced here  
89 (Dataset EV2). Each dot represents a single dataset. *CHD4* (RNAi) datasets are highlighted in red.

90

91 Appendix Figure S5

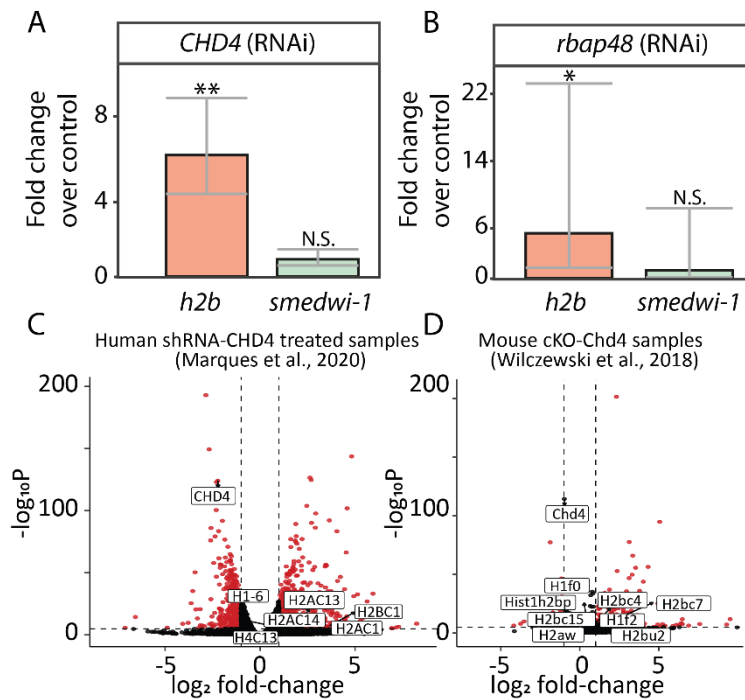

92

93 Appendix Figure S5. *CHD4* (RNAi) recapitulates molecularly the inhibition of m6A genes. (A-B) Shown is a qPCR  
 94 quantification of *h2b* and *smcdwi-1* expression following RNAi of the NuRD component encoding genes *CHD4* (A)  
 95 or *rbap48* (B) in comparison to control libraries (error bars indicate the 95% confidence interval; two-sided t-test  
 96 Bonferroni corrected; \*\* -  $p < 0.01$ , \* -  $p < 0.05$ ). (C-D) volcano plot of human (C) and mouse (D) gene expression  
 97 changes following inhibition or conditional knockout of CHD4 encoding gene (Marques *et al*, 2020; Wilczewski *et*  
 98 *al*, 2018). Highlighted and labeled are significantly overexpressed histone-encoding genes, as well as the human  
 99 or mouse *CHD4* homolog (red and black, significant and non-significant change in gene expression; adjusted p-  
 100 value < 0.0001).

101 **Appendix Table S1. Gene models of contig IDs in figures**

| Figure     | Panel | Label in figure | Gene Model                                                                |
|------------|-------|-----------------|---------------------------------------------------------------------------|
| Figure 2   | A     | dd_254          | SMESG000073667                                                            |
| Figure 4   | A     | dd_783          | SMESG000016810.1                                                          |
| Figure 4   | A     | dd_1837         | SMESG000016779.1; SMESG000016781.1                                        |
| Figure 4   | A     | dd_11930        | SMESG000016771.1                                                          |
| Figure 4   | A     | dd_18852        | SMESG000016780.1                                                          |
| Figure 4   | A     | dd_1616         | SMESG000022742.1                                                          |
| Figure 4   | A     | dd_19404        | NA                                                                        |
| Figure 4   | A     | dd_15204        | SMESG000081110.1                                                          |
| Figure 4   | A     | dd_20482        | NA                                                                        |
| Figure 4   | A     | dd_2089         | SMESG000016811.1                                                          |
| Figure 4   | A     | dd_7261         | NA                                                                        |
| Figure 4   | A     | dd_2262         | SMESG000038305.1                                                          |
| Figure 4   | A     | dd_1785         | SMESG000005903.1; SMESG000006038.1                                        |
| Figure 4   | A     | dd_1938         | SMESG000007684.1                                                          |
| Figure 4   | A     | dd_4923         | SMESG000063585.1                                                          |
| Figure 4   | A     | dd_6637         | SMESG000071518.1                                                          |
| Figure 4   | A     | dd_2759         | SMESG000081460.1                                                          |
| Figure 4   | A     | dd_3377         | SMESG000026665.1                                                          |
| Figure 4   | E     | dd_175          | SMESG000049722.1                                                          |
| Figure 4   | E     | dd_4575         | SMESG000068883.1                                                          |
| Figure 4   | E     | dd_3194         | SMESG000053627.1                                                          |
| Figure 5   | A     | dd_25629        | SMESG000013634.1                                                          |
| Figure 5   | H     | dd_1837         | SMESG000016779.1; SMESG000016781.1                                        |
| Figure 5   | H     | dd_585          | SMESG000062836.1                                                          |
| Figure 6   | E     | dd_72           | NA                                                                        |
| Figure 6   | E     | dd_888          | SMESG000073691.1                                                          |
| Figure 6   | E     | dd_75           | SMESG000027140.1                                                          |
| Figure 6   | E     | dd_115          | SMESG000066413.1; SMESG000066416.1                                        |
| Figure 7   | E     | dd_25269        | SMESG000013634.1                                                          |
| Figure EV1 | A     | dd_6450         | SMESG000034548.1                                                          |
| Figure EV1 | A     | dd_6641         | SMESG000073528.1                                                          |
| Figure EV1 | A     | dd_4676         | SMESG000074445.1; SMESG000074456.1;<br>SMESG000074577.1; SMESG000074578.1 |
| Figure EV1 | A     | dd_2322         | SMESG000043489.1; SMESG000043668.1                                        |
| Figure EV1 | A     | dd_7426         | SMESG000019097.1                                                          |
| Figure EV1 | A     | dd_7282         | SMESG000001341.1                                                          |
| Figure EV1 | B     | dd_3491         | SMESG000018260.1                                                          |
| Figure EV1 | B     | dd_7891         | SMESG000008619.1                                                          |

|                    |   |         |                                    |
|--------------------|---|---------|------------------------------------|
| Figure EV1         | B | dd_8450 | SMESG000003195.1                   |
| Figure EV1         | B | dd_5578 | SMESG000001953.1                   |
| Figure EV1         | B | dd_7162 | SMESG000039495.1                   |
| Figure EV1         | B | dd_5316 | SMESG000075874.1                   |
| Figure EV4         | E | dd_3194 | SMESG000053627.1                   |
| Figure EV4         | G | dd_3194 | SMESG000053627.1                   |
| Appendix Figure S1 | A | dd_6641 | SMESG000073528.1                   |
| Appendix Figure S1 | B | dd_3491 | SMESG000018260.1                   |
| Appendix Figure S1 | C | dd_4808 | SMESG000067906.1                   |
| Appendix Figure S1 | D | dd_659  | SMESG000036375.1                   |
| Appendix Figure S4 | A | dd_115  | SMESG000066413.1; SMESG000066416.1 |
| Appendix Figure S5 | A | dd_888  | SMESG000073691.1                   |
| Appendix Figure S6 | A | dd_72   | NA                                 |

102 **Appendix Table S2. Genes cloned in this study**

| Contig              | Gene model     | Primer ID  | Sequence                    |
|---------------------|----------------|------------|-----------------------------|
| dd_Smed_v4_4676_1   | SMESG000074445 | Kiaa1429_F | CCGCTATCCGTTGTTA<br>TTATGCG |
| dd_Smed_v4_4676_1   | SMESG000074445 | Kiaa1429_R | TCCGTAATCGTGGCCAC<br>GC     |
| dd_Smed_v4_7282_1   | SMESG000001341 | rbm15_F    | GGGAGTTATCTGATG<br>GTCAAAGA |
| dd_Smed_v4_7282_1   | SMESG000001341 | rbm15_R    | CCGGCACCCTAACA<br>GAA       |
| dd_Smed_v4_6450_0_1 | SMESG000034548 | mettl3_F   | AATTGAAACCAGACG<br>AAATGCA  |
| dd_Smed_v4_6450_0_1 | SMESG000034548 | mettl3_R   | AGGTGTGTGGTTGCA<br>GAGG     |
| dd_Smed_v4_7426_1   | SMESG000019097 | hakai_F    | ACGGTCAATGTCTCGT<br>AGCC    |
| dd_Smed_v4_7426_1   | SMESG000019097 | hakai_R    | GCACGGCATCATGTTT<br>AGG     |
| dd_Smed_v6_2322_4   | SMESG000043489 | wtap_F     | CCCGATGAAATGGTG<br>AAATC    |
| dd_Smed_v6_2322_4   | SMESG000043489 | wtap_R     | TCGGGATCATCCTCTT<br>CATC    |

|                     |                |                                       |                             |
|---------------------|----------------|---------------------------------------|-----------------------------|
| dd_Smed_v4_3491_0_1 | SMESG000018260 | ythdc-1_F                             | CAGTCATCTCCCAATG<br>TTGACG  |
| dd_Smed_v4_3491_0_1 | SMESG000018260 | ythdc-1_R                             | ACAAACCGCAATAATT<br>GTAACCA |
| dd_Smed_v6_3194_0_1 | SMESG000053627 | Intestine marker_F                    | GATCGAGGAAATCTT<br>GACGAAC  |
| dd_Smed_v6_3194_0_1 | SMESG000053627 | Intestine marker_R                    | GTGAATACTTCAGGA<br>GCCATCC  |
| dd_Smed_v6_175_0_1  | SMESG000049722 | <i>cathepsin+</i> marker_F            | ACGATCTCGGAAAAC<br>ATTTCG   |
| dd_Smed_v6_175_0_1  | SMESG000049722 | <i>cathepsin+</i> marker_R            | AGCCATCGTAGCTATT<br>CCACA   |
| dd_Smed_v6_701_0_1  | SMESG000077782 | collagen F                            | GTGGAGAACTTGGAG<br>CAAGC    |
| dd_Smed_v6_701_0_1  | SMESG000077782 | collagen R                            | AACACCAGCATCTCCT<br>GGAC    |
| dd_Smed_v6_4575_0_1 | SMESG000068883 | Protonephridia_F                      | CAACCCCAACGCGATA<br>CAAT    |
| dd_Smed_v6_4575_0_1 | SMESG000068883 | Protonephridia_R                      | CAGAAAGAAAGAGCC<br>TCCGC    |
| dd_Smed_v4_4676_1   | SMESG000074445 | <i>kiaa1429</i> non-<br>overlapping_F | AGGACGTTTCCAGCAA<br>TGAG    |
| dd_Smed_v4_4676_1   | SMESG000074445 | <i>kiaa1429</i> non-<br>overlapping_R | CATGGTTCGCCTTGGGA<br>TTAG   |
| dd_Smed_v6_2331_0_1 | SMESG000068192 | <i>CHD4</i> _F                        | CGCGAGCATTTTCATCT<br>TGTA   |
| dd_Smed_v6_2331_0_1 | SMESG000068192 | <i>CHD4</i> _R                        | AAACGATGGGCTTCAT<br>CAAC    |
| dd_Smed_v6_2065_0_1 | NA             | <i>rbAp48</i> _F                      | GAATGGCCAAGCTTA<br>ACTGC    |
| dd_Smed_v6_2065_0_1 | NA             | <i>rbAp48</i> _R                      | TTTGGGCTCCAAGTGA<br>AATC    |
| dd_Smed_v6_115_0_1  | SMESG000066413 | Intestine marker_F                    | CAGTGCTTGCCGTCTG<br>TCTA    |

|                     |                |                               |                              |
|---------------------|----------------|-------------------------------|------------------------------|
| dd_Smed_v6_115_0_1  | SMESG000066413 | Intestine marker_R            | TAGCAACCAGTGCATT<br>GAGC     |
| dd_Smed_v4_72_0_1   | NA             | Intestine marker_F            | AATGTTGGGATGCTGC<br>AGTT     |
| dd_Smed_v4_72_0_1   | NA             | Intestine marker_R            | CAAAACGCAGGGCTC<br>ATACT     |
| dd_Smed_v4_75_0_1   | SMESG000027140 | Intestine marker_F            | TGCCGTTATGAACATG<br>ATTTTCG  |
| dd_Smed_v4_75_0_1   | SMESG000027140 | Intestine marker_R            | ACACAAAATATCGCAT<br>CCTGCC   |
| dd_Smed_v4_888_0_1  | SMESG000073691 | Intestine marker_F            | TCTTGGACTTCATCGA<br>CTTTCT   |
| dd_Smed_v4_888_0_1  | SMESG000073691 | Intestine marker_R            | AACTGGTTTTTCGTTGT<br>CTACAAA |
| dd_Smed_v6_1837_0_1 | SMESG000016779 | <i>kiaa1429</i> -cluster #1 F | TTGGAACAGACCACTG<br>GTGA     |
| dd_Smed_v6_1837_0_1 | SMESG000016779 | <i>kiaa1429</i> -cluster #1 R | AACGACGACCTTTCCA<br>ACTG     |
| dd_Smed_v6_585_0_1  | SMESG000062836 | <i>kiaa1429</i> -cluster #2 F | ACAAGTGCAATGCC<br>GTAAC      |
| dd_Smed_v6_585_0_1  | SMESG000062836 | <i>kiaa1429</i> -cluster #2 R | CCTCATTTCCACGGT<br>ATCA      |

103 **Appendix Table S3. Inline m6A-seq2 barcode sequences**

| Condition                    | Replicate | Barcode sequence | Experiment |
|------------------------------|-----------|------------------|------------|
| <i>kiaa1429</i> (RNAi)       | #1        | NNNCCAGTCT       | m6A-seq2   |
| <i>kiaa1429</i> (RNAi)       | #2        | NNNCCTCCGT       | m6A-seq2   |
| <i>kiaa1429</i> (RNAi)       | #3        | NNNGCACTCT       | m6A-seq2   |
| <i>unc22</i> (RNAi), Control | #1        | NNNGCCCATT       | m6A-seq2   |
| <i>unc22</i> (RNAi), Control | #2        | NNNGGCCTCT       | m6A-seq2   |
| <i>unc22</i> (RNAi), Control | #3        | NNNTATCACT       | m6A-seq2   |

|                                                         |    |            |                            |
|---------------------------------------------------------|----|------------|----------------------------|
| <i>unc22</i> (RNAi), Control<br><i>lme4Δ/Δ/Ndt80Δ/Δ</i> | #1 | NNNGTTTGCT | Species mixing<br>m6A-seq2 |
| <i>unc22</i> (RNAi), Control<br><i>lme4Δ/Δ/Ndt80Δ/Δ</i> | #2 | NNNCCTTAGT | Species mixing<br>m6A-seq2 |
| <i>kiaa1429</i> (RNAi)<br><i>Ndt80Δ/Δ</i>               | #1 | NNNCAACTGT | Species mixing<br>m6A-seq2 |
| <i>kiaa1429</i> (RNAi)<br><i>Ndt80Δ/Δ</i>               | #2 | NNNCACCTCT | Species mixing<br>m6A-seq2 |

104 **Appendix Table S4. Mapping of library data to the planarian transcriptome**

| Condition              | Type     | Mapping ratio | Unmapped read ratio |
|------------------------|----------|---------------|---------------------|
| <i>kiaa1429</i> (RNAi) | Input    | 0.871783      | 0.128217            |
| <i>kiaa1429</i> (RNAi) | pulldown | 0.876082      | 0.123918            |
| <i>kiaa1429</i> (RNAi) | Input    | 0.872294      | 0.127706            |
| <i>kiaa1429</i> (RNAi) | pulldown | 0.88221       | 0.11779             |
| <i>kiaa1429</i> (RNAi) | Input    | 0.88312       | 0.11688             |
| <i>kiaa1429</i> (RNAi) | pulldown | 0.885548      | 0.114452            |
| Control                | Input    | 0.886476      | 0.113524            |
| Control                | pulldown | 0.895546      | 0.104454            |
| Control                | Input    | 0.840594      | 0.159406            |
| Control                | pulldown | 0.891526      | 0.108474            |
| Control                | Input    | 0.882362      | 0.117638            |

|         |          |          |          |
|---------|----------|----------|----------|
| Control | pulldown | 0.893802 | 0.106198 |
|---------|----------|----------|----------|

105



106 **Appendix Table S5. qPCR primers used in this study**

| <b>Gene</b>       | <b>Sequence</b>                  | <b>Contig</b>            | <b>Gene model</b>  |
|-------------------|----------------------------------|--------------------------|--------------------|
| <i>11930_F</i>    | GAGGATTCTCCTATTAACCC<br>AAC      | dd_smed_v6_11930<br>_0_1 | SMESG00001<br>6771 |
| <i>11930_R</i>    | CGTGCGATCAGCGTTTATATT            | dd_smed_v6_11930<br>_0_1 | SMESG00001<br>6771 |
| <i>gapdh_F*</i>   | TCTTCCCAACCAATTTTCTGT<br>TCTG    | dd_smed_v6_78_0_<br>1    | SMESG00005<br>2353 |
| <i>gapdh_R*</i>   | CCGAATATTTTATTTGGCTCTT<br>CCTCCA | dd_smed_v6_78_0_<br>1    | SMESG00005<br>2353 |
| <i>smedwi1_F*</i> | GTCTCAGAAAACAATAAAGG<br>TACAGCA  | dd_smed_v6_659_0<br>_1   | SMESG00003<br>6375 |
| <i>smedwi1_R*</i> | TGCTGCAATACACTCGGAGAC<br>A       | dd_smed_v6_659_0<br>_1   | SMESG00003<br>6375 |
| <i>mettl3_F</i>   | ACAGTTTTGTCCTATGGTAC<br>C        | dd_Smed_v6_6450_<br>0_1  | SMESG000034<br>548 |
| <i>mettl3_R</i>   | GAAAGCAAGTATTGAGAAAT<br>GAAC     | dd_Smed_v6_6450_<br>0_1  | SMESG000034<br>548 |
| <i>wtap_F</i>     | GGAGCTGATTTCCATTAAGAA<br>TG      | dd_Smed_v6_2322_<br>0_4  | SMESG000043<br>489 |
| <i>wtap_R</i>     | TCGATATTGATTTTGCACACT<br>G       | dd_Smed_v6_2322_<br>0_4  | SMESG000043<br>489 |
| <i>3194_F</i>     | CATTTGTGCTATTACGGTGTC            | dd_smed_v6_3194_<br>0_1  | SMESG000053<br>627 |
| <i>3194_R</i>     | GGTGAGTTCATTAGTGACAG             | dd_smed_v6_3194_<br>0_1  | SMESG000053        |

|                |                             |                         |                    |
|----------------|-----------------------------|-------------------------|--------------------|
|                | C                           | 0_1                     | 627                |
| <i>h2b_F</i>   | TGTAAGGTTGATTTTACCAGG<br>AG | dd_smed_v6_4808_<br>0_1 | SMESG00006<br>7906 |
| <i>h2b_R</i>   | CCCGTGTACTTAGTAACAGC        | dd_smed_v6_4808_<br>0_1 | SMESG00006<br>7906 |
| <i>rbm15_F</i> | GGCGAATTCAATGTCAAAGTA<br>G  | dd_Smed_v6_7282_<br>0_1 | SMESG00000<br>1341 |
| <i>rbm15_R</i> | AGCCAAAACAGGATCAACTG        | dd_Smed_v6_7282_<br>0_1 | SMESG00000<br>1341 |

107 \* Primer sequences previously published (van Wolfswinkel *et al*, 2014).

## 108 **Supplementary References**

109 Guo T, Peters AHFM & Newmark PA (2006) A *bruno-like* gene is required for stem cell  
110 maintenance in planarians. *Dev Cell* 11: 159–169

111 Marques JG, Gryder BE, Pavlovic B, Chung Y, Ngo QA, Frommelt F, Gstaiger M, Song Y,  
112 Benischke K, Laubscher D, *et al* (2020) NuRD subunit CHD4 regulates super-enhancer  
113 accessibility in rhabdomyosarcoma and represents a general tumor dependency. *eLife* 9

114 Wilczewski CM, Hepperla AJ, Shimbo T, Wasson L, Robbe ZL, Davis IJ, Wade PA & Conlon FL  
115 (2018) CHD4 and the NuRD complex directly control cardiac sarcomere formation. *Proc Natl  
116 Acad Sci USA* 115: 6727–6732

117 van Wolfswinkel JC, Wagner DE & Reddien PW (2014) Single-cell analysis reveals functionally  
118 distinct classes within the planarian stem cell compartment. *Cell Stem Cell* 15: 326–339
